# Supplementary material for: Latching dynamics as a basis for short-term recall
Source: PLOS journal article supplement (doi:10.1371/journal.pcbi.1008809), 2021-09-15
Supplement: S14 (10.1371/journal.pcbi.1008809.s014) [file journal.pcbi.1008809.s014]

## Appendix for “Latching dynamics as a basis for short-term recall”: Deriving scaling law under the assumption of equal visits

The quantity  $M$  can be estimated under the assumption of equal visits to each of the patterns. Under such an assumption, the probability of going to a new item  $m$  times and to one already visited at the  $m + 1$ -th time step is given by  $1(1 - 1/(L - 1)) \dots (1 - (m - 1)/(L - 1))m/(L - 1)$  and this contributes to  $M = m + 1$ . So taking a sum for  $m$  from 1 to  $L - 1$  of this probability times  $m + 1$  gives

$$M \equiv \sum_{m=0}^{L-1} \frac{m(m+1)}{L-1} \prod_{k=0}^{m-1} \left(1 - \frac{k}{L-1}\right). \quad (1)$$

One simple approximation of this expression for  $L$  large yields

$$M \simeq \sqrt{2(L-1)} \gamma\left(\frac{3}{2}, \frac{L-1}{2}\right) - e^{-\frac{L-1}{2}} + 1, \quad (2)$$

where  $\gamma$  is the *lower* incomplete Gamma function, which for  $L \rightarrow \infty$  grows as a square root,

$$M \simeq \sqrt{(\pi/2)(L-1)} + 1. \quad (3)$$

One way to approximate this expression for  $L$  large is to assume  $1 - \frac{k}{L-1} \simeq e^{-\frac{k}{L-1}}$ , so that the product of the exponentials becomes the exponential of the sum, and one has

$$M \simeq \sum_{m=0}^{L-1} \frac{m(m+1)}{L-1} \exp\left(-\frac{m(m-1)}{2(L-1)}\right). \quad (4)$$

To further approximate the above sum with an integral, let  $x = \frac{m}{\sqrt{L-1}}$ , then we have

$$M \simeq \int_0^{\sqrt{L-1}} dx \left( \sqrt{L-1} x^2 + x \right) e^{-\frac{1}{2} \left( x^2 - \frac{x}{\sqrt{L-1}} \right)}. \quad (5)$$

Keeping only the first term in the exponent of the integral

$$\int_0^{\sqrt{L-1}} dx \left( \sqrt{L-1} x^2 \right) e^{-\frac{x^2}{2}} = \sqrt{2(L-1)} \gamma\left(\frac{3}{2}, \frac{L-1}{2}\right), \quad (6)$$

where

$$\gamma\left(\frac{3}{2}, \frac{L-1}{2}\right) = \int_0^{\frac{L-1}{2}} t^{\frac{3}{2}-1} e^{-t} dt \quad (7)$$

is the *lower* incomplete Gamma function, and

$$\int_0^{\sqrt{L-1}} dx x e^{-\frac{x^2}{2}} = -e^{-\frac{L-1}{2}} + 1. \quad (8)$$

An alternative expression for  $M$  is in terms of the *upper* incomplete Gamma function,

$$M \equiv \sum_{m=1}^{L-1} \frac{m(m+1)}{L-1} \frac{(L-1)!}{(L-1-m)!(L-1)^{m-1}} = \frac{e^{L-1}}{(L-1)^{L-1}} \Gamma(L, L-1). \quad (9)$$

To derive its asymptotic behaviour for large  $L$ , it is convenient to separate one term and write

$$M = 1 + \sum_{l=1}^{L-1} \frac{(L-1)!}{(L-1-l)!(L-1)^l}, \quad (10)$$

and then use Stirling's approximation for the factorial to evaluate the sum as half an indefinite integral for  $-\infty < l < \infty$ , which can be evaluated at its saddle point near  $l = 1/2$ , yielding again, to leading order,  $M \simeq \sqrt{(\pi/2)(L-1)} + 1$ .
